# Supplementary material
Source: MDPI journal article supplement (https://www.mdpi.com/1424-8247/17/5/558)
Supplement: s1 [file s1]

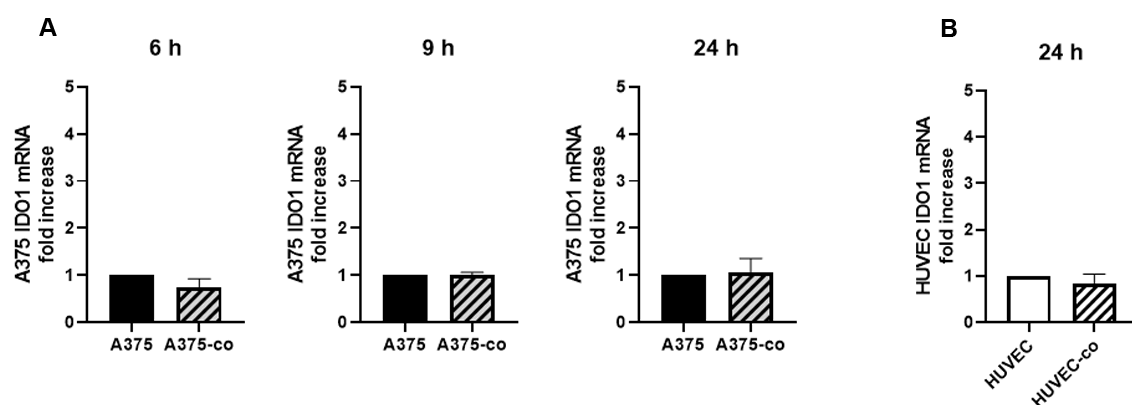

**Supplementary Figure S2. A, B) RT-PCR for IDO1 expression in A375 , HUVECs and co-cultures.** A) RT-PCR in A375 alone and in A375 co-cultured with HUVECs (A375-co). Time-course. B) RT-PCR in HUVECs alone and in HUVECs co-cultured with A375 (HUVEC-co). Mean  $\pm$  SEM, n=3.
